# Supplementary material for: Circular RNA SNX29 Sponges miR-744 to Regulate Proliferation and Differentiation of Myoblasts by Activating the Wnt5a/Ca2+ Signaling Pathway
Source: PubMed Central journal article supplement — Mol Ther Nucleic Acids. 2019 Apr 9;16:481–93. doi: 10.1016/j.omtn.2019.03.009 (PMC6495097; doi:10.1016/j.omtn.2019.03.009), 2019-04-09
Supplement: mmc1.pdf [file mmc1.pdf]

OMTN, Volume 16

## **Supplemental Information**

### **Circular RNA SNX29 Sponges miR-744 to Regulate Proliferation and Differentiation of Myoblasts by Activating the Wnt5a/Ca<sup>2+</sup> Signaling Pathway**

**Shujun Peng, Chengchuang Song, Hui Li, Xiukai Cao, Yilei Ma, Xiaogang Wang, Yongzhen Huang, Xianyong Lan, Chuzhao Lei, Buren Chaogetu, and Hong Chen**



**Figure S3**

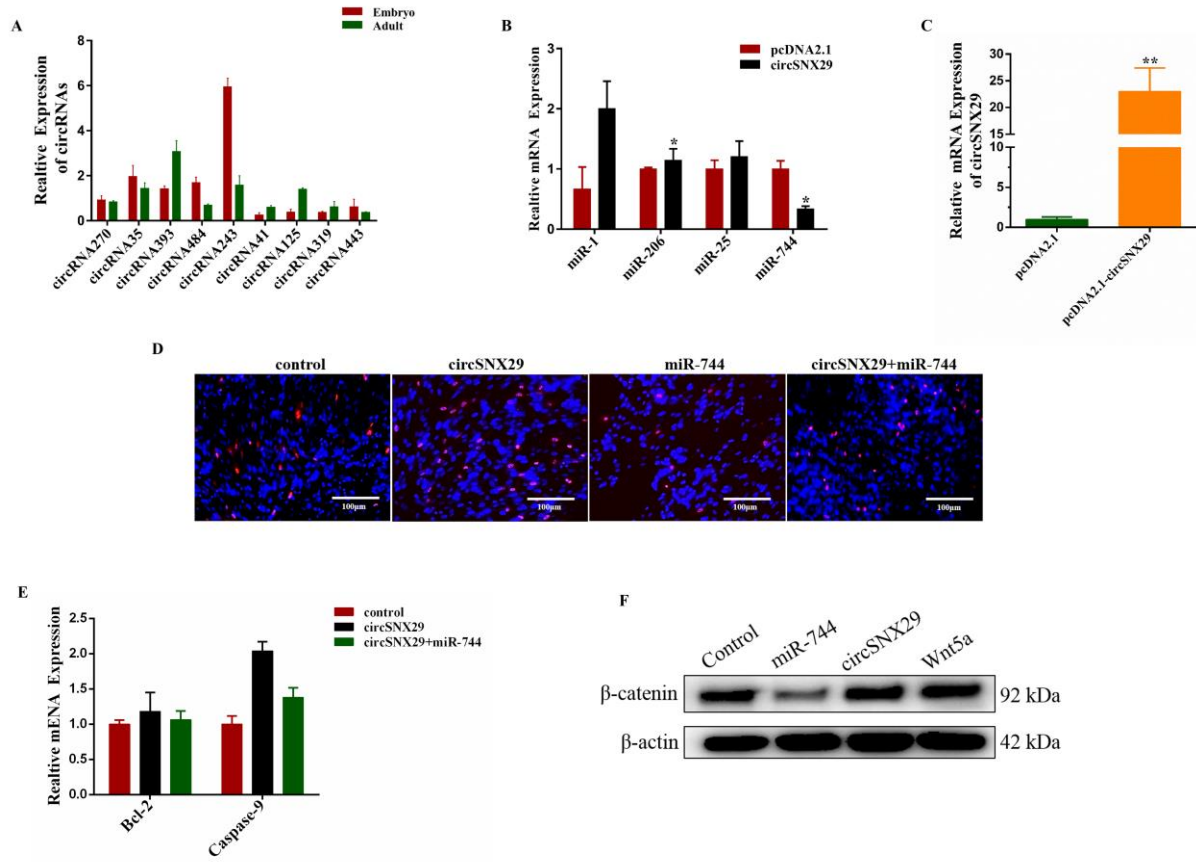

Figure S4

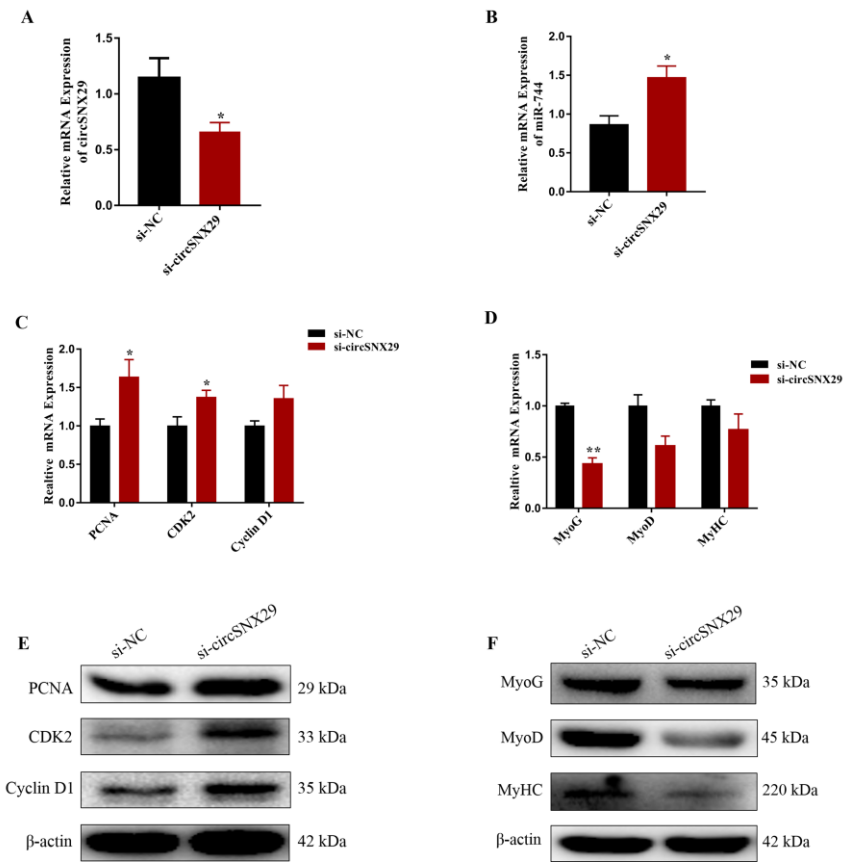

## Figure Legends

**Supplementary Figure 1. Overexpression of miR-744 Inhibits Apoptosis of Bovine Primary Myoblasts.** (A-C) Myoblasts were transfected with pcDNA3.1 or pcDNA3.1-miR-744. (A) Cell apoptosis was determined by Hoechst 33342/PI dual staining assays; the scale bar represents 100  $\mu\text{m}$ . (B, C) mRNA and protein levels of apoptosis marker genes (Caspase-9, P53, Bcl-2, and Bax) was detected by quantitative real-time PCR (qPCR) and Western blotting assay. (D) The schematic illustration of the proposed model depicting of 6 putative target genes of miR-744 as mentioned above from 3 microRNA prediction databases, TargetScan.org, DAVID.org, and miRtarbase.org. (E) The binding sites analysis in CaMKII $\delta$  and Wnt5a 3'UTR. (F) The sketch map of psi-Check2 vector in which CaMKII $\delta$  and Wnt5a 3'UTR and mutation 3'UTR were inserted into the 3' end of Renilla luciferase gene (hRluc). Values are mean  $\pm$  SEM for three biological replicates, \* $P < 0.05$ .

**Supplementary Figure 2. Effects of Wnt5a Overexpression and CaMKII $\delta$  Silencing on the Cell Apoptosis.** (A, B) Myoblasts were treated by pcDNA3.1-Wnt5a or si-CaMKII $\delta$ , and the mRNA expression of Wnt5a and CaMKII $\delta$  were measured by real-time qPCR. (C, D) The expression of Wnt5a and CaMKII $\delta$  in skeletal muscle of Qinchuan cattle at the embryonic stage compared with the adult stage is shown. (E-G) The expression of apoptosis marker genes Bcl-2 and caspase-9 was measured by qPCR and Western blotting. Values are mean  $\pm$  SEM for three biological replicates, \* $P < 0.05$ ; \*\* $P < 0.01$ .

**Supplementary Figure 3. Overexpression of circSNX29 Promotes Cell Apoptosis by Targeting miR-744.** (A) Validation of differential expression levels of selected circRNAs at embryonic and adult stages. (B) Effect of circSNX29 on the abundance of miR-1, miR-206, miR-25 and miR-744. (C) Visualization of the efficiency of circSNX29 overexpression vector pcDNA2.1-circSNX29 by qPCR. (D) Cell apoptosis was determined by Hoechst 33342/PI dual staining assays; the scale bar represents 100  $\mu\text{m}$ . (E) the mRNA expression of apoptosis marker genes (Bcl-2 and Caspase-9) was detected using qPCR. (F) Nuclear  $\beta$ -catenin levels of cells transfected with circSNX29 and Wnt5a were detected Western blotting. Values are mean  $\pm$  SEM for three biological replicates, \* $P < 0.05$ ; \*\* $P < 0.01$ .

**Supplementary Figure 4. Knockdown of circSNX29 Suppresses Cell Differentiation while Promoting Proliferation.** (A) The efficiency of circSNX29 knockdown were evaluated by qPCR. (B) The effects of circSNX29 silencing on the expression of miR-744 in myoblasts. (C and D) Real-time qPCR analysis of the

proliferation/differentiation-related genes. (E and F) Western blot detection of PCNA, CDK2, CyclinD1, MyOG, MyOD, and MyHC protein levels with  $\beta$ -actin treatment. Values are mean  $\pm$  SEM for three biological replicates, \* $P$  < 0.05; \*\* $P$  < 0.01.

**Table S1 Stem-loop primers for reverse-transcribed miRNAs**

| <b>miRNA ID</b> | <b>stem-loop primer</b>                            |
|-----------------|----------------------------------------------------|
| bta-miR-1       | gtcgtatccagtgcaggggccgaggtattcgactggatacgacATACATA |
| bta-miR-206     | gtcgtatccagtgcaggggccgaggtattcgactggatacgacCCACACA |
| bta-miR-101     | gtcgtatccagtgcaggggccgaggtattcgactggatacgacTTCAGTT |
| bta-miR-423-5p  | gtcgtatccagtgcaggggccgaggtattcgactggatacgacAAAGTCT |
| bta-miR-7f      | gtcgtatccagtgcaggggccgaggtattcgactggatacgacAACTATA |
| bta-miR-25      | gtcgtatccagtgcaggggccgaggtattcgactggatacgacTCAGACC |
| bta-miR-128     | gtcgtatccagtgcaggggccgaggtattcgactggatacgacAAAGAGA |
| bta-miR-744     | gtcgtatccagtgcaggggccgaggtattcgactggatacgacTGCTGTT |
| bta-miR-140     | gtcgtatccagtgcaggggccgaggtattcgactggatacgacTCCGTGG |
| bta-miR-126     | gtcgtatccagtgcaggggccgaggtattcgactggatacgacCGCATTA |
| bta-miR-134     | gtcgtatccagtgcaggggccgaggtattcgactggatacgacCCACTCT |
| bta-miR-150     | gtcgtatccagtgcaggggccgaggtattcgactggatacgacACACTGG |

**Table S2 Primers for qPCR**

| <b>miRNA ID</b> | <b>Forward primer 5'→3'</b> | <b>Reverse primer 5'→3'</b> |
|-----------------|-----------------------------|-----------------------------|
| bta-miR-1       | gcgcgTGGAATGTAAAGAAG        | GCAGGGTCCGAGGTATTC          |
| bta-miR-206     | gcgcgTGGAATGTAAGGAAG        | GCAGGGTCCGAGGTATTC          |
| bta-miR-101     | gcgcgcgTACAGTACTGTGATA      | GCAGGGTCCGAGGTATTC          |
| bta-miR-423-5p  | atTTGAGGGGCAGAGAGC          | GCAGGGTCCGAGGTATTC          |
| bta-miR-7f      | gcgcgcaTGAGGTAGTAGATTG      | GCAGGGTCCGAGGTATTC          |
| bta-miR-25      | gcgcCATTGCACTTGTCTC         | GCAGGGTCCGAGGTATTC          |
| bta-miR-128     | gcgcTCACAGTGAACCGGT         | GCAGGGTCCGAGGTATTC          |
| bta-miR-744     | atataTGCGGGGCTAGGGCT        | GCAGGGTCCGAGGTATTC          |
| bta-miR-140     | gcgcgTACCACAGGGTAGAA        | GCAGGGTCCGAGGTATTC          |
| bta-miR-126     | gcgcaaCGTACCGTGAGTAAT       | GCAGGGTCCGAGGTATTC          |
| bta-miR-134     | agcgcgTGTGACTGGTTGACC       | GCAGGGTCCGAGGTATTC          |
| bta-miR-150     | gcgcgTCTCCCAACCTTGT         | GCAGGGTCCGAGGTATTC          |
| U6              | CTCGCTTCGGCAGCACA           | AACGCTTCACGAATTTGCGT        |
| Wnt5a           | CAACTGGCAGGACTTTCTCAA       | CATCTCCGATGCCGGAAC          |
| CaMKII $\delta$ | ACACCCGTGGATCTGTCAAC        | ACACTCGAACTGGACTTCCT        |
| Calcineurin     | CGGAGGAGACCAAGCAGAAG        | TGTAGTCCTCGTCCCTCGTCC       |
| NFATC1          | TTTAACCAGAGCGACGAGGG        | GTCCACTGTCCCGCCATAG         |
| $\beta$ -actin  | CATCCTGACCCTCAAGTA          | CTCGTTGTAGAAGGTGTG          |
| GAPDH           | ACCACTTTGGCATCGTGGAG        | GGGCCATCCACAGTCTTCTG        |



|           |                       |                       |
|-----------|-----------------------|-----------------------|
| MyHC      | GGAGGCTGATGAACAAGCCAA | GAAGTCTCGGGTCTTTGCTCT |
| MyoG      | AGGGGATCATCTGCTCCCAG  | ATCCCGGCAGACAATCTCAG  |
| MyoD      | ACGGCATGATGGACTACAGC  | AGGCAGTCGAGGCTCGACA   |
| BCL-2     | ATGACCGAGTACCTGAAC    | CATACAGCTCCACAAAGG    |
| P53       | CACCAGCCAAAGAAGAAAC   | CTCTCGGAACATCTCATAG   |
| Caspase9  | TGGTGGTCATCCTGTCTC    | CATCCATCTGTGCCATAAAC  |
| BAX       | GAGATGAATTGGACAGTAACA | TTGAAGTTGCCGTCAGAA    |
| CDK2      | AGGGAACGTACGGAGTTGTG  | GACATCCAGCAGCTTGACAAT |
| PCNA      | TCCAGAACAAGAGTATAGC   | TACAACAGCATCTCCAAT    |
| CyclinD1  | ATGAAGGAGACCATCCCCCT  | CGCCAGGTTCCACTTGAGTT  |
| CircSNX29 | ACAGTGTGGAAGCCAGTCCT  | TCCAGCGGCTAACTGTCATGG |
| SNX29     | TGTTACGAAGGTCCAGGCAC  | TGGGACAACCTTCGGCTGTTT |

**Table S3 Primers for vector construction**

| Name                               | Primer sequence 5'→3'                           |
|------------------------------------|-------------------------------------------------|
| pcDNA <sub>2.1</sub> -circSNX29-F  | CGGGAT <u>CCC</u> CAGAGTCCATGACAGTTA            |
| pcDNA <sub>2.1</sub> -circSNX29-R  | GT <u>ACCGAGGC</u> CAGAAGGTAACAGGC              |
| pcDNA <sub>3.1</sub> -Wnt5a(CDS)-F | GGGGT <u>ACCC</u> CATGAAGAAGTCGATTGGAATATTAA    |
| pcDNA <sub>3.1</sub> -Wnt5a(CDS)-R | CGGGAT <u>CCCG</u> CTACTTGCAGACGAACTGGTCCA      |
| Psi-CHECK-circSNX29-W-F            | <u>GCTCGAGGCCGCTGGACGCAGGCACCTG</u>             |
| Psi-CHECK-circSNX29-W-R            | GG <u>CGGCCGCT</u> AACTGTCATGGACTCTGGTACC       |
| Psi-CHECK-circSNX29-Mut-F          | <u>GCTCGAGGCCGCTGGACGCAGGCACCTG</u>             |
| Psi-CHECK-circSNX29-Mut-R          | GG <u>CGGCCGCT</u> AACTGTCATGGACTCTGGTACC       |
| Psi-CHECK-CaMKIIδ-3'UTR-W-F        | <u>GCTCGAGCGTCTTACTGAGTGGAGCAGTTG</u>           |
| Psi-CHECK-CaMKIIδ-3'UTR-W-R        | GG <u>CGGCCG</u> CAGCCCCACAGGAATGGAATAAA        |
| Psi-CHECK-CaMKIIδ-3'UTR-Mut-F      | <u>GCTCGAGCCCTTAATTATCCTGCGTGAT</u>             |
| Psi-CHECK-CaMKIIδ-3'UTR-Mut-R      | GG <u>CGGCCG</u> GAGCCCCACAGGAATGGAATAAA        |
| Psi-CHECK-Wnt5a-3'UTR-W-F          | <u>GCTCGAGGCTCCCAGGACCCACTTATTTATA</u>          |
| Psi-CHECK-Wnt5a-3'UTR-W-R          | GG <u>CGGCCGCGGG</u> ATATGAGATTCTTGTCTCAA       |
| Psi-CHECK-Wnt5a-3'UTR-Mut-F        | <u>GCTCGAGGCTCCCAGGACCCACTTATTTATA</u>          |
| Psi-CHECK-Wnt5a-3'UTR-Mut-R        | GG <u>CGGCCGCTT</u> TATAATATTATTAACGCGAGAGTTCTC |

Notes: The nucleotides with underline is the restriction enzyme cutting site.

**Text S1: CircSNX29 sequence**

CircSNX29>**GCCGCTGG**ACGCAGGCACCTGCCTCTCCCAGATGCATGGCTGGGCC  
CCGCTGCAAGTGCTGCACGGCCACGCCGAGGTGCTCTTCCCCGTCAGCGGCGTGG  
GCTCCTACGGGCCTGCAGATGCCCCCCTCGGGAGCCTGGAGAACGGGACGGGAC  
CTGAGGACCACATCCTCCCGGAGCCGGGACCCCGGTACAGTGTGGAAGCCAGTC  
CTCCAGGCCAGGAGAGTCCTCTGAGCAGCCTGTTACCTTCTGCCTCGGTACCAGA  
GTCCAT**GACAGTTA**

**ABBREVIATIONS:** circRNAs, Circular RNAs; *SNX29*, sorting nexin 29; CaMKII $\delta$ , calmodulin-dependent protein kinase; ceRNAs, competing endogenous RNAs; KEGG, kyoto encyclopedia of genes and genomes; MyoD, myogenic differentiation antigen; Myf5, myogenic factor 5; MyoG, myogenin; EICI RNAs, exon-intron circRNAs; HDAC4/5, histone deacetylase 4/5; MEF2, myocyte enhancer factor 2; HEK293T, human embryonic kidney 293; CCK-8, cell counting kit-8; MTT, 3-(4,5-Dimethylthiazol-2-yl)-2,5-Diphenyltetrazolium Bromide; EdU, 5-ethynyl-2'-deoxyuridine; MyHC, myosin heavy Chains; Bcl-2, B-cell lymphoma 2; Bax, bcl2-associated x; P53, tumor suppressor gene; CDK2, cyclin-dependent kinase 2; PCNA, proliferating cell nuclear antigen; cell cycle protein d1; siRNA, small interfering RNA; qRT-PCR, quantitative RT-PCR.
